# Supplementary material
Source: Royal Society of Chemistry journal article supplement (doi:10.1039/d6tc00568c)
Supplement: d6tc00568c1.pdf [file d6tc00568c1.pdf]

## Supplementary Information

### **Thiol-Functionalized Carbon Dot-Enabled Self-Catalytic Reduction-Dynamic Assembly for Constructing Three-Dimensional Porous Reduced Graphene Oxide Aerogels toward High-Performance Terahertz Modulation**

*Chi Xiao, Mingyang Yang, Yi Li, Bin Li, Zhixun Zhang, Lipei Fu, Ming Zhou\*, Qijun Li\* and Jing Tan\**

C. Xiao, Y. Li

School of Mechanical Engineering, Jiangsu University, Zhenjiang, 212013, China

Prof. M. Yang

State Key Laboratory of Clean and Efficient Turbomachinery Power Equipment, Department of Mechanical Engineering, Tsinghua University, Beijing, 100084, China

B. Li, Z. Zhang, Prof. J. Tan

Institute of Technology for Carbon Neutralization, College of Physical Science and Technology, Yangzhou University, Yangzhou, 225009, China

E-mail: [tanjing@yzu.edu.cn](mailto:tanjing@yzu.edu.cn)

Prof. M. Zhou

a.State Key Laboratory of Clean and Efficient Turbomachinery Power Equipment, Department of Mechanical Engineering, Tsinghua University, Beijing, 100084, China

b.Key Laboratory for Advanced Materials Processing Technology, Ministry of Education, Beijing 100084, China

E-mail: [zhouming@tsinghua.edu.cn](mailto:zhouming@tsinghua.edu.cn)

Prof. L. Fu

School of Petroleum and Natural Gas Engineering, Changzhou University, Changzhou, Jiangsu Province, 213164, China

Prof. Q. Li

School of Mechanical Engineering, Yangzhou University, Yangzhou 225009, China

E-mail: [liqijun@yzu.edu.cn](mailto:liqijun@yzu.edu.cn)

Prof. J. Tan

State Key Laboratory of Organic Electronics and Information Displays & Institute of Advanced Materials (IAM), Nanjing University of Posts & Telecommunications, 9 Wenyuan Road, Nanjing 210023, China

## Supplementary Figures

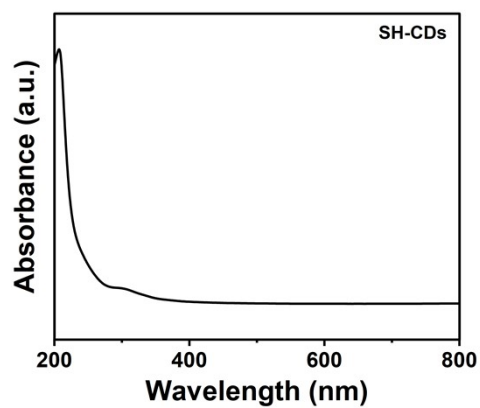

Figure S1. UV-vis absorption spectrum of SH-CDs.

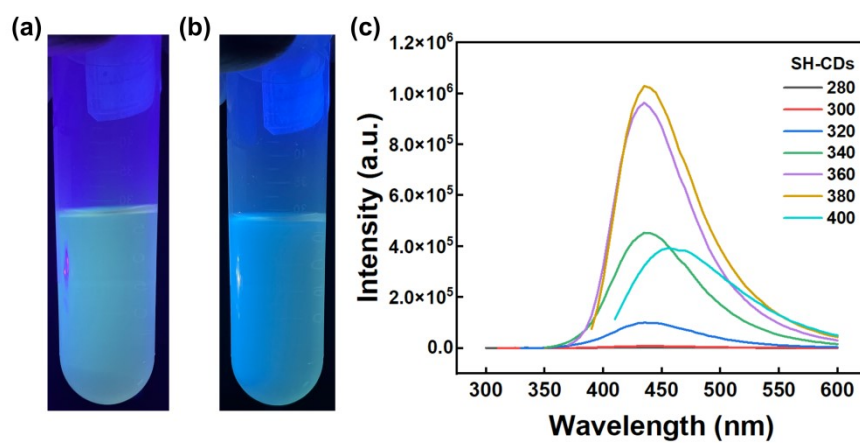

Figure S2. SH-CDs solution a) Fluorescence image under 365 nm excitation, b) Fluorescence image under 395 nm excitation, c) Fluorescence spectrum.

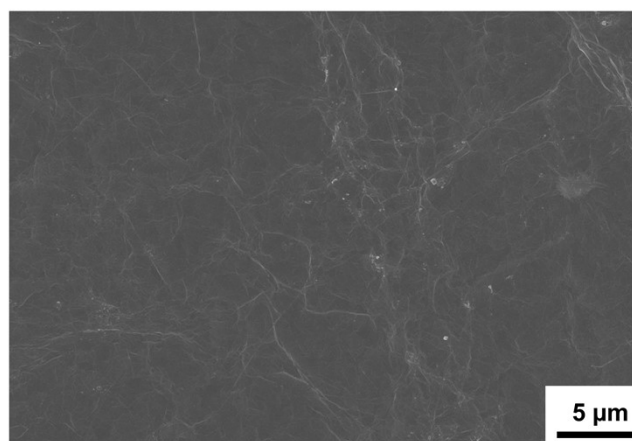

Figure S3. SEM of GO

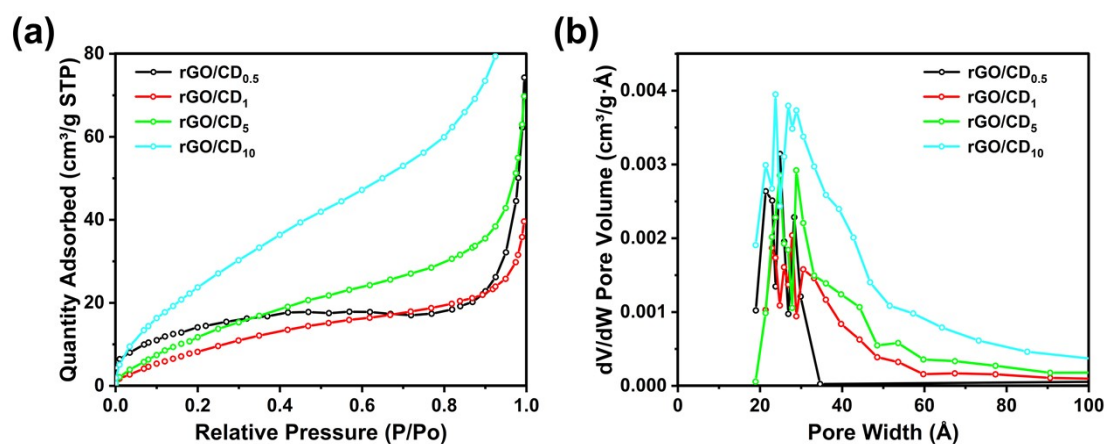

**Figure S4.** a) N<sub>2</sub> adsorption-desorption isotherms and b) BET pore size distribution of rGO aerogel

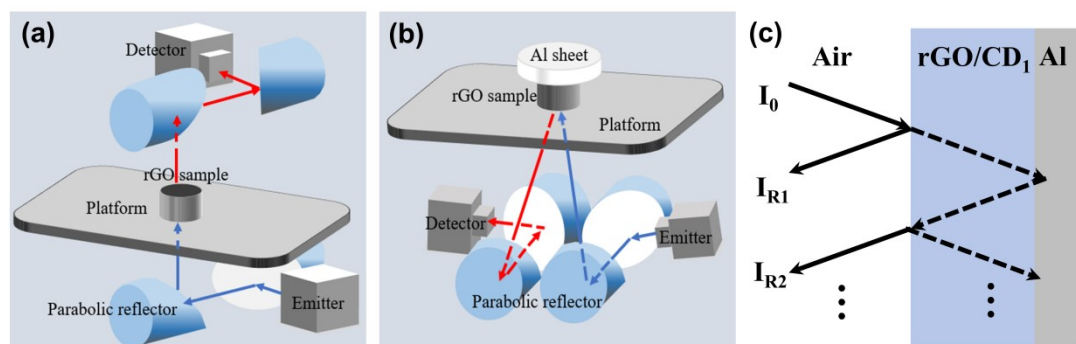

**Figure S5.** a) Schematic diagram of the THz-TDS system used for THz transmission experiments, b-c) Schematic diagram of the THz-TDS system used for THz absorption experiments.

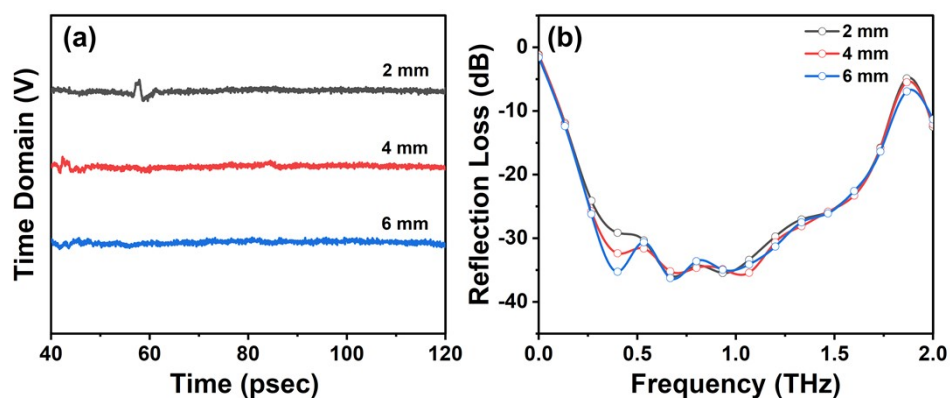

**Figure S6.** a) Reflection time-domain spectrum, b) Reflection loss of rGO/CD<sub>1</sub> with 2, 4, 6, 8, and 10 mm thickness.

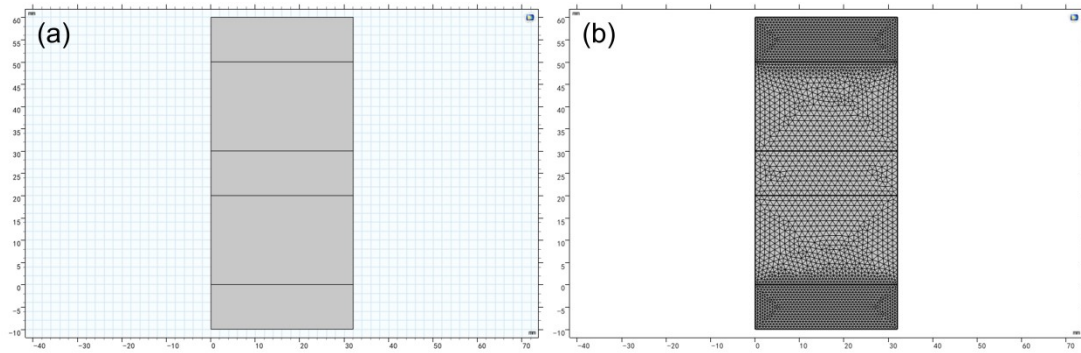

**Figure S7.** Finite element simulation model of rGO aerogel: a) Schematic diagram of the model. b) Meshing.

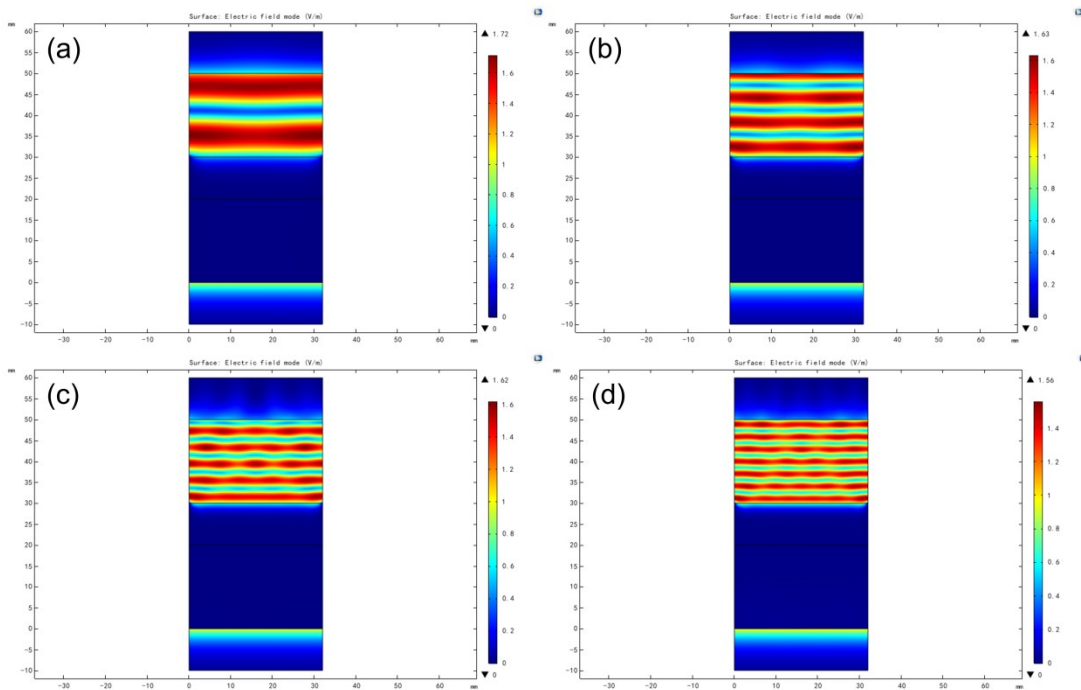

**Figure S8.** Electric field intensity of the model after electromagnetic wave incidence: a-d) Electric field intensities of 4 mm rGO aerogel after being incident upon electromagnetic waves of 0.5 THz, 1 THz, 1.5 THz, and 2 THz.

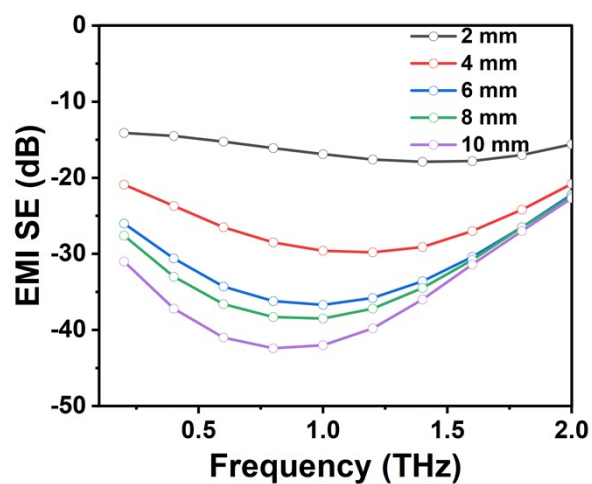

**Figure S9.** The EMI SE simulation results of rGO aerogel with 2,4,6,8 and 10 mm thickness.

### Supplementary Tables

**Table S1.** Conductivity of GO and rGO aerogels doped with different amounts of SH-CDs solution.

| Sample Name           | Resistance ( $\Omega/\text{cm}$ ) |
|-----------------------|-----------------------------------|
| GO                    | $8 \times 10^7$                   |
| rGO/CD <sub>0.5</sub> | 330                               |
| rGO/CD <sub>1</sub>   | 240                               |
| rGO/CD <sub>5</sub>   | 1k                                |
| rGO/CD <sub>10</sub>  | 2.5k                              |

**Table S2.** Calculation of the density of three-dimensional rGO/CD.

| Sample Name           | Weight/g | Height/cm | Bottom diameter/cm | Density/ $\text{mg} \cdot \text{cm}^{-3}$ |
|-----------------------|----------|-----------|--------------------|-------------------------------------------|
| rGO/CD <sub>0.5</sub> | 0.0158   | 1.12      | 1.12               | 14.32                                     |
| rGO/CD <sub>1</sub>   | 0.0146   | 1.32      | 1.11               | 11.43                                     |
| rGO/CD <sub>5</sub>   | 0.0142   | 1.86      | 1.08               | 8.33                                      |
| rGO/CD <sub>10</sub>  | 0.0148   | 1.97      | 1.09               | 8.05                                      |

**Table S3.** BET surface area and adsorption average pore diameter of rGO/CD.

| Sample Name           | BET Surface Area/m <sup>2</sup> ·g <sup>-1</sup> | Adsorption average pore diameter/Å |
|-----------------------|--------------------------------------------------|------------------------------------|
| rGO/CD <sub>0.5</sub> | 41.1877                                          | 66.3936                            |
| rGO/CD <sub>1</sub>   | 39.1449                                          | 62.5251                            |
| rGO/CD <sub>5</sub>   | 55.7388                                          | 77.3826                            |
| rGO/CD <sub>10</sub>  | 98.9739                                          | 89.2160                            |

**Table S4.** Percentages of C, N and O atomic speciation in GO and rGO/CD<sub>1</sub>.

|                           | Deconvoluted C 1s |      |         | Deconvoluted O 1s |         |       | C and O content |     |
|---------------------------|-------------------|------|---------|-------------------|---------|-------|-----------------|-----|
|                           | C-C/C=C           | C-OH | C-O/C-N | O=C-O             | C-O/O-H | O=C-O | C               | O   |
| <b>GO</b>                 | 35%               | 23%  | 31%     | 11%               | 100%    | /     | 69%             | 27% |
| <b>rGO/CD<sub>1</sub></b> | 73%               | /    | 27%     | /                 | 90%     | 10%   | 81%             | 10% |
